# Supplementary material
Source: PubMed Central journal article supplement (PMC5108027)
Supplement: nl6b02715_si_002.pdf [file nl6b02715_si_002.pdf]

# Supporting Information:

## Heavy-Hole States in Germanium Hut Wires

Hannes Watzinger,<sup>\*,†,‡</sup> Christoph Kloeffel,<sup>\*,¶</sup> Lada Vukušić,<sup>†,‡</sup> Marta  
D. Rossell,<sup>§,||</sup> Violetta Sessi,<sup>⊥</sup> Josip Kukučka,<sup>†,‡</sup> Raimund Kirchschlager,<sup>†,‡</sup>  
Elisabeth Lausecker,<sup>†,‡</sup> Alisha Truhlar,<sup>†,‡</sup> Martin Glaser,<sup>‡</sup> Armando Rastelli,<sup>‡</sup>  
Andreas Fuhrer,<sup>||</sup> Daniel Loss,<sup>¶</sup> and Georgios Katsaros<sup>†,‡</sup>

<sup>†</sup>*Institute of Science and Technology Austria, Am Campus 1, 3400 Klosterneuburg, Austria*

<sup>‡</sup>*Johannes Kepler University, Institute of Semiconductor and Solid State Physics,  
Altenbergerstr. 69, 4040 Linz, Austria*

<sup>¶</sup>*University of Basel, Department of Physics, Klingelbergstr. 82, 4056 Basel, Switzerland*

<sup>§</sup>*Electron Microscopy Center, Empa, Swiss Federal Laboratories for Materials Science and  
Technology, Überlandstrasse 129, 8600 Dübendorf, Switzerland*

<sup>||</sup>*IBM Research Zürich, CH-8803 Rüschlikon, Switzerland*

<sup>⊥</sup>*Technical University Dresden, Chair for Nanoelectronic Materials, 01062 Dresden,  
Germany*

E-mail: hannes.watzinger@ist.ac.at; c.kloeffel@unibas.ch

## Finite element simulations of the strain in a HW

The two images in Figure 1 represent COMSOL simulations of the out-of-plane (left) and the in-plane (right) strain distribution of a capped HW. For our theoretical model we have extracted an out-of-plane value of 2 and an in-plane value of -3.3 percent.

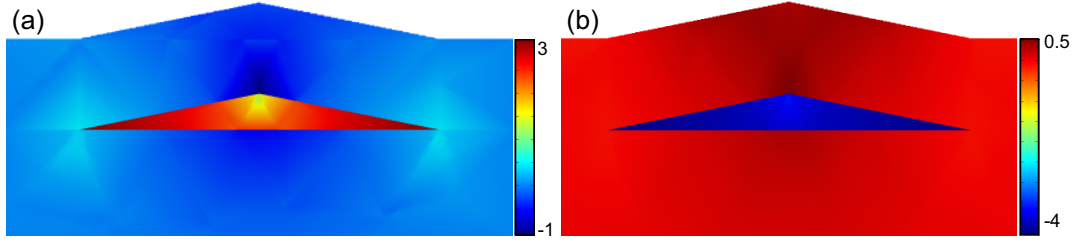

Figure 1: COMSOL simulations of the out-of-plane (a) and the in-plane strain distribution (b) in a capped HW. The color scale represents the percentage of strain with positive (negative) values meaning tensile (compressive) strain.

## Matrix representation of spin operators

We use the following matrix representation<sup>1</sup> for the operators  $J_\nu$ . The basis states are  $|3/2\rangle$ ,  $|1/2\rangle$ ,  $|-1/2\rangle$ , and  $|-3/2\rangle$ .

$$J_x = \begin{pmatrix} 0 & \frac{\sqrt{3}}{2} & 0 & 0 \\ \frac{\sqrt{3}}{2} & 0 & 1 & 0 \\ 0 & 1 & 0 & \frac{\sqrt{3}}{2} \\ 0 & 0 & \frac{\sqrt{3}}{2} & 0 \end{pmatrix}, \quad J_y = \begin{pmatrix} 0 & -i\frac{\sqrt{3}}{2} & 0 & 0 \\ i\frac{\sqrt{3}}{2} & 0 & -i & 0 \\ 0 & i & 0 & -i\frac{\sqrt{3}}{2} \\ 0 & 0 & i\frac{\sqrt{3}}{2} & 0 \end{pmatrix}, \quad J_z = \begin{pmatrix} \frac{3}{2} & 0 & 0 & 0 \\ 0 & \frac{1}{2} & 0 & 0 \\ 0 & 0 & -\frac{1}{2} & 0 \\ 0 & 0 & 0 & -\frac{3}{2} \end{pmatrix}. \quad (1)$$

In the derivation of the pure-HH Hamiltonian [Eq. (34)], we consider the Pauli matrices

$$\sigma_x = \begin{pmatrix} 0 & 1 \\ 1 & 0 \end{pmatrix}, \quad \sigma_y = \begin{pmatrix} 0 & -i \\ i & 0 \end{pmatrix}, \quad \sigma_z = \begin{pmatrix} 1 & 0 \\ 0 & -1 \end{pmatrix}, \quad (2)$$

where  $|3/2\rangle$  and  $|-3/2\rangle$  are the basis states.

## Calculation with electric fields

It is well possible that an electric field  $E_z$  along the out-of-plane axis was present in the experiment. When the direct coupling  $-eE_z z$  and the standard Rashba spin-orbit coupling  $\alpha E_z (k_x J_y - k_y J_x)$ , with  $\alpha = -0.4 \text{ nm}^2 e^{1,2}$  are added to the Hamiltonian  $H$  [Eq. (1) of

the main text], our finding that the low-energy states correspond to HH states remains unaffected, even for strong  $E_z$  around  $100 \text{ V}/\mu\text{m}$ . Due to symmetries in our setup, we believe that electric fields  $E_y$  along  $y$  were very small. Nevertheless, we find numerically that the HH character of the eigenstates is preserved even when the direct and the standard Rashba coupling that are caused by nonzero  $E_y$  are included in the model. We note that additional corrections besides the standard Rashba spin-orbit interaction arise for hole states in the presence of an electric field,<sup>1</sup> but these terms are all small and will not change our result that the low-energy states are of HH type.

## Couplings $C_{\pm}$

Here we explain the calculation of the matrix elements  $C_{\pm}$  that are presented in Eq. (4) of the main text. When the magnetic field is applied along the  $z$  axis, the Hamiltonian is

$$\begin{aligned}
H = \frac{\hbar^2}{2m} & \left[ \left( \gamma_1 + \frac{5\gamma_2}{2} \right) k^2 - 2\gamma_2 \sum_{\nu} k_{\nu}^2 J_{\nu}^2 - 4\gamma_3 (\{k_x, k_y\} \{J_x, J_y\} + \text{c.p.}) \right] \\
& + 2\mu_B B_z (\kappa J_z + q J_z^3) + b \sum_{\nu} \epsilon_{\nu\nu} J_{\nu}^2 + V(y, z)
\end{aligned} \tag{3}$$

and the vector potential is  $\mathbf{A} = (-B_z y, 0, 0)$ . Consequently,

$$\{k_y, k_z\} = -\partial_y \partial_z, \tag{4}$$

$$\{k_x, k_z\} = -\partial_x \partial_z + i \frac{e}{\hbar} B_z y \partial_z, \tag{5}$$

$$\{k_x, k_y\} = -\partial_x \partial_y + i \frac{e}{\hbar} B_z y \partial_y + i \frac{e}{2\hbar} B_z, \tag{6}$$

$$k_x^2 = -\partial_x^2 + 2i \frac{e}{\hbar} B_z y \partial_x + \frac{e^2}{\hbar^2} B_z^2 y^2, \tag{7}$$

and  $k_y^2 = -\partial_y^2$ ,  $k_z^2 = -\partial_z^2$ . Using the matrices for the spin operators  $J_\nu$  listed in Eq. (1), one finds

$$\langle \pm 3/2 | \{J_y, J_z\} | \pm 1/2 \rangle = -i \frac{\sqrt{3}}{2}, \quad (8)$$

$$\langle \pm 3/2 | \{J_x, J_z\} | \pm 1/2 \rangle = \pm \frac{\sqrt{3}}{2}, \quad (9)$$

whereas

$$\langle \pm 3/2 | Q | \pm 1/2 \rangle = 0 \quad (10)$$

when the operator  $Q$  is  $\{J_x, J_y\}$ ,  $J_x^2$ ,  $J_y^2$ ,  $J_z^2$ ,  $J_z$ , or  $J_z^3$ . Therefore,

$$\begin{aligned} C_\pm &= \langle \pm 3/2, 1, 1, 0 | H | \pm 1/2, 2, 2, 0 \rangle \\ &= i\sqrt{3} \frac{\gamma_3 \hbar^2}{m} \langle \varphi_{1,1,0} | \{k_y, k_z\} | \varphi_{2,2,0} \rangle \mp \sqrt{3} \frac{\gamma_3 \hbar^2}{m} \langle \varphi_{1,1,0} | \{k_x, k_z\} | \varphi_{2,2,0} \rangle, \end{aligned} \quad (11)$$

where the wave functions [see Eq. (3) of the main text] of the basis states are

$$\varphi_{1,1,0} = \frac{2}{\sqrt{L_z L_y}} \sin \left[ \pi \left( \frac{z}{L_z} + \frac{1}{2} \right) \right] \sin \left[ \pi \left( \frac{y}{L_y} + \frac{1}{2} \right) \right], \quad (12)$$

$$\varphi_{2,2,0} = \frac{2}{\sqrt{L_z L_y}} \sin \left[ 2\pi \left( \frac{z}{L_z} + \frac{1}{2} \right) \right] \sin \left[ 2\pi \left( \frac{y}{L_y} + \frac{1}{2} \right) \right] \quad (13)$$

inside the HW ( $|z| < L_z/2$ ,  $|y| < L_y/2$ ) and  $\varphi_{1,1,0} = 0 = \varphi_{2,2,0}$  outside. We note that  $\langle \varphi_{1,1,\tilde{k}_x} | \partial_x \partial_z | \varphi_{2,2,\tilde{k}_x} \rangle$  vanishes for arbitrary  $\tilde{k}_x$  after integration over the  $y$  axis due to the orthogonality of the basis functions for the  $y$  direction. Thus, using Eqs. (4) and (5) in Eq. (11) yields

$$C_\pm = -i\sqrt{3} \frac{\gamma_3 \hbar^2}{m} \langle \varphi_{1,1,0} | \partial_y \partial_z | \varphi_{2,2,0} \rangle \mp i\sqrt{3} \frac{\gamma_3 e \hbar}{m} B_z \langle \varphi_{1,1,0} | y \partial_z | \varphi_{2,2,0} \rangle. \quad (14)$$

With the integrals (analogous for  $z$ )

$$\int_{-L_y/2}^{L_y/2} dy \sin\left[\pi\left(\frac{y}{L_y} + \frac{1}{2}\right)\right] \frac{2\pi}{L_y} \cos\left[2\pi\left(\frac{y}{L_y} + \frac{1}{2}\right)\right] = -\frac{4}{3}, \quad (15)$$

$$\int_{-L_y/2}^{L_y/2} dy \sin\left[\pi\left(\frac{y}{L_y} + \frac{1}{2}\right)\right] y \sin\left[2\pi\left(\frac{y}{L_y} + \frac{1}{2}\right)\right] = -\frac{8L_y^2}{9\pi^2}, \quad (16)$$

we finally find

$$\langle\varphi_{1,1,0}|\partial_y\partial_z|\varphi_{2,2,0}\rangle = \frac{64}{9L_yL_z}, \quad (17)$$

$$\langle\varphi_{1,1,0}|y\partial_z|\varphi_{2,2,0}\rangle = \frac{128L_y}{27\pi^2L_z}, \quad (18)$$

and so

$$C_{\pm} = -i\frac{64\gamma_3\hbar^2}{3\sqrt{3}L_yL_zm} \mp i\frac{128L_y\gamma_3e\hbar B_z}{9\sqrt{3}\pi^2L_zm}. \quad (19)$$

This is the result shown in Eq. (20), considering that the Bohr magneton is  $\mu_B = e\hbar/(2m)$ . As explained in the above derivation, the first term on the right-hand side results from the part proportional to  $\partial_y\partial_z\{J_y, J_z\}$  in the Hamiltonian  $H$ , while the second term results from the part proportional to  $B_z y\partial_z\{J_x, J_z\}$ .

## Correction $g_C$ to the out-of-plane g-factor

In the previous section we derived the couplings

$$C_{\pm} = \langle\pm 3/2, 1, 1, 0|H|\pm 1/2, 2, 2, 0\rangle = -i\frac{64\gamma_3\hbar^2}{3\sqrt{3}L_yL_zm} \mp i\frac{256\gamma_3L_y\mu_B B_z}{9\sqrt{3}\pi^2L_z} \quad (20)$$

assuming that the magnetic field is applied in the out-of-plane direction  $z$ . In order to calculate the associated correction  $g_C$  to the g-factor  $g_{\perp}$ , we consider a four-level system with the basis states  $|3/2, 1, 1, 0\rangle$ ,  $|-3/2, 1, 1, 0\rangle$ ,  $|1/2, 2, 2, 0\rangle$ , and  $|-1/2, 2, 2, 0\rangle$  (see also Figure 4 (b) of the main article). Projection of the Hamiltonian  $H$  [Eq. (3)] onto this basis

yields the effective Hamiltonian

$$H_{\text{eff}} = \begin{pmatrix} E_{g,+} & 0 & C_+ & 0 \\ 0 & E_{g,-} & 0 & C_- \\ C_+^* & 0 & E_{e,+} & 0 \\ 0 & C_-^* & 0 & E_{e,-} \end{pmatrix}, \quad (21)$$

where the asterisk stands for complex conjugation and

$$E_{g,\pm} = \frac{\hbar^2 \pi^2}{2L_z^2 m_{\text{HH}}} + \frac{\hbar^2 \pi^2 (\gamma_1 + \gamma_2)}{2L_y^2 m} + \frac{9}{4} b (\epsilon_{zz} - \epsilon_{\parallel}) + \frac{(\pi^2 - 6)(\gamma_1 + \gamma_2) e^2 L_y^2 B_z^2}{24\pi^2 m} \pm \left( 3\kappa + \frac{27}{4} q \right) \mu_B B_z, \quad (22)$$

$$E_{e,\pm} = \frac{2\hbar^2 \pi^2}{L_z^2 m_{\text{LH}}} + \frac{2\hbar^2 \pi^2 (\gamma_1 - \gamma_2)}{L_y^2 m} + \frac{1}{4} b (\epsilon_{zz} - \epsilon_{\parallel}) + \frac{(2\pi^2 - 3)(\gamma_1 - \gamma_2) e^2 L_y^2 B_z^2}{48\pi^2 m} \pm \left( \kappa + \frac{1}{4} q \right) \mu_B B_z \quad (23)$$

are the energies on the diagonal. We assumed here that  $\epsilon_{xx} = \epsilon_{yy} = \epsilon_{\parallel}$  and omitted the state-independent offset  $15b\epsilon_{\parallel}/4$ . The introduced effective masses are

$$m_{\text{HH}} = \frac{m}{\gamma_1 - 2\gamma_2}, \quad (24)$$

$$m_{\text{LH}} = \frac{m}{\gamma_1 + 2\gamma_2}. \quad (25)$$

From second-order perturbation theory,<sup>1</sup> we find that the low-energy  $2 \times 2$  Hamiltonian obtained after diagonalization of Eq. (21) is

$$H_{\text{eff}}^{2 \times 2} \simeq \begin{pmatrix} E_{g,+} - \frac{|C_+|^2}{\Delta_+} & 0 \\ 0 & E_{g,-} - \frac{|C_-|^2}{\Delta_-} \end{pmatrix}, \quad (26)$$

where we defined

$$\Delta_{\pm} = E_{e,\pm} - E_{g,\pm}. \quad (27)$$

With  $\tilde{\sigma}_z$  as a Pauli operator that is based on the low-energy eigenstates, Eq. (26) can be written as

$$H_{\text{eff}}^{2 \times 2} \simeq \frac{1}{2} \left( E_{g,+} + E_{g,-} - \frac{|C_+|^2}{\Delta_+} - \frac{|C_-|^2}{\Delta_-} \right) + \frac{1}{2} \left( E_{g,+} - E_{g,-} - \frac{|C_+|^2}{\Delta_+} + \frac{|C_-|^2}{\Delta_-} \right) \tilde{\sigma}_z. \quad (28)$$

The effective Zeeman splitting and the out-of-plane g-factor  $g_{\perp}$  are therefore determined by

$$g_{\perp} \mu_B B_z \simeq E_{g,+} - E_{g,-} - \frac{|C_+|^2}{\Delta_+} + \frac{|C_-|^2}{\Delta_-}. \quad (29)$$

From Eq. (22), it is evident that

$$E_{g,+} - E_{g,-} = \left( 6\kappa + \frac{27}{2}q \right) \mu_B B_z. \quad (30)$$

Given our parameters for Ge HWs, we find that the splittings  $\Delta_{\pm}$  are predominantly determined by the confinement rather than the strain and that they can be well approximated by

$$\Delta_{\pm} \simeq \frac{2\hbar^2 \pi^2}{L_z^2 m_{\text{LH}}} - \frac{\hbar^2 \pi^2}{2L_z^2 m_{\text{HH}}} = \frac{\hbar^2 \pi^2 (3\gamma_1 + 10\gamma_2)}{2L_z^2 m} = \Delta \quad (31)$$

using  $L_z \ll L_y$ . With the calculated expressions for the couplings  $C_{\pm}$  [Eq. (20)], we finally obtain

$$g_{\perp} \simeq 6\kappa + \frac{27}{2}q + g_C, \quad (32)$$

where

$$g_C = \frac{|C_-|^2 - |C_+|^2}{\mu_B B_z \Delta} = -\frac{2^{17} \gamma_3^2}{81 \pi^4 (3\gamma_1 + 10\gamma_2)} \quad (33)$$

is the correction that results from the  $B_z$ -induced difference in the tiny LH admixtures ( $|\pm 1/2, 2, 2, 0\rangle$ ) to the eigenstates of type  $|3/2, 1, 1, 0\rangle$  and  $|-3/2, 1, 1, 0\rangle$ . We note that  $|C_{\pm}|/\Delta < 0.05$  for our parameters, and so the perturbation theory used in the derivation of  $H_{\text{eff}}^{2 \times 2}$  applies. Remarkably, our result for  $g_C$  depends solely on the Luttinger parameters  $\gamma_{1,2,3}$ .

## Hamiltonian for pure heavy holes

If the contributions from LH states ( $j_z = \pm 1/2$ ) are ignored completely, the Hamiltonian of Eq. (1) in the main text can be simplified by projection onto the HH subspace, i.e., by removing all terms that cannot couple a spin  $j_z = 3/2$  (or  $j_z = -3/2$ , respectively) with either  $j_z = 3/2$  or  $j_z = -3/2$ . As evident, e.g., from the standard representations of the  $4 \times 4$  matrices  $J_\nu$  and the  $2 \times 2$  Pauli matrices  $\sigma_\nu$  [see Eqs. (1) and (2)], this projection can be achieved by substituting  $\{J_x, J_y\} \rightarrow 0$  (analogous for cyclic permutations),  $J_x^3 \rightarrow 3\sigma_x/4$ ,  $J_y^3 \rightarrow -3\sigma_y/4$ ,  $J_z^3 \rightarrow 27\sigma_z/8$ ,  $J_{x,y}^2 \rightarrow 3/4$ ,  $J_z^2 \rightarrow 9/4$ ,  $J_{x,y} \rightarrow 0$ ,  $J_z \rightarrow 3\sigma_z/2$ , which leads to the pure-HH Hamiltonian

$$\begin{aligned}
 H_{\text{HH}} = & \frac{\hbar^2}{2m} [(\gamma_1 - 2\gamma_2) k_z^2 + (\gamma_1 + \gamma_2) (k_x^2 + k_y^2)] \\
 & + \left(3\kappa + \frac{27}{4}q\right) \mu_B B_z \sigma_z + \frac{3}{2}q\mu_B (B_x \sigma_x - B_y \sigma_y) + V(y, z)
 \end{aligned} \tag{34}$$

for the low-energy hole states in the HW. Thus, if LH states are ignored, one expects small in-plane g-factors  $g_{\parallel} \simeq 3q \simeq 0.2$  and very large out-of-plane g-factors  $g_{\perp} \simeq 6\kappa + 27q/2 \simeq 21.4$ ,<sup>3</sup> where we used again the band structure parameters  $\kappa = 3.41$  and  $q = 0.07$  of bulk Ge.<sup>1,4</sup>



## References

- (1) Winkler, R. *Spin-Orbit Coupling Effects in Two-Dimensional Electron and Hole Systems*; Springer, Berlin, 2003.
- (2) Kloeffel, C.; Trif, M.; Loss, D. *Phys. Rev. B* **2011**, *84*, 195314.
- (3) Van Kesteren, H. W.; Cosman, E. C.; Van der Poel, W. A. J. A.; Foxon, C. T. *Phys. Rev. B* **1990**, *41*, 5283.
- (4) Lawaetz, P. *Phys. Rev. B* **1971**, *4*, 3460.
